# Supplementary material for: A Review and Secondary Analysis of Competition-Related Impacts of Nonindigenous Aquatic Plants in the Laurentian Great Lakes
Source: MDPI journal article supplement (doi:10.3390/plants10020406), 2021-02-20
Supplement: s1 [file s1]

**Supplementary Materials:**

Profiles and current distribution maps for each species can be found at <https://www.glerl.noaa.gov/glansis/>. Detailed impact assessments including noncompetition components of impact are published in the Appendices of NOAA TM-161a–c and available in full text at <https://www.glerl.noaa.gov/pubs/#techRep>. Original sources for all map data and impact statements can be found in these respective sources.
